# Supplementary material for: A mixed filter algorithm for sympathetic arousal tracking from skin conductance and heart rate measurements in Pavlovian fear conditioning
Source: PubMed Central journal article supplement (PMC7179889; doi:10.1371/journal.pone.0231659), 2020-04-23
Supplement: pone.0231659.s001.pdf [file pone.0231659.s001.pdf]

# EM algorithm derivations and supplementary data

## 1 Algorithm derivations

### 1.1 Derivation of E-step filter updates

#### 1.1.1 Probability mass function of $m_k$

$$\begin{aligned}
 P(m_k|x_k) &= p_k^{m_k} (1 - p_k)^{1-m_k} \\
 &= \exp\left\{ \log \left[ p_k^{m_k} (1 - p_k)^{1-m_k} \right] \right\} \\
 &= \exp \left[ m_k \log(p_k) + (1 - m_k) \log(1 - p_k) \right] \\
 &= \exp \left[ m_k \log \left( \frac{p_k}{1 - p_k} \right) + \log(1 - p_k) \right] \\
 &= \exp \left[ m_k (\beta_0 + \beta_1 x_k) + \log \left( \frac{1}{1 + e^{\beta_0 + \beta_1 x_k}} \right) \right]
 \end{aligned} \tag{1}$$

#### 1.1.2 Mean and variance of the posterior density function $p(x_k|y^k)$

We follow an approach similar to [1] in deriving the filter updates. Recall that linear models are assumed to relate sympathetic arousal to the phasic-derived and tonic components.

$$r_k = \gamma_0 + \gamma_1 x_k + v_k \tag{2}$$

$$s_k = \delta_0 + \delta_1 x_k + w_k \tag{3}$$

We take the two noise terms  $v_k$  and  $w_k$  to be independent of each other. Consequently, the density functions  $p(r_k|x_k)$  and  $p(s_k|x_k)$  conditioned on already having observed  $x_k$  are independent of each other in the following derivation.

$$\begin{aligned}
 p(x_k|y^k) &= \frac{p(x_k|y^{k-1})p(y_k|x_k)}{p(y_k|y^{k-1})} \\
 &= \frac{p(x_k|y^{k-1})P(m_k|x_k)p(r_k|x_k)p(s_k|x_k)P(n_{k,1:J}|x_k)}{p(y_k|y^{k-1})} \\
 &\propto \exp \left[ \frac{-(x_k - x_{k|k-1})^2}{2\sigma_{k|k-1}^2} + m_k \log \left( \frac{p_k}{1 - p_k} \right) + \log(1 - p_k) \right. \\
 &\quad \left. - \frac{(r_k - \gamma_0 - \gamma_1 x_k)^2}{2\sigma_v^2} - \frac{(s_k - \delta_0 - \delta_1 x_k)^2}{2\sigma_w^2} + \sum_{j=1}^J \log(\lambda_{k,j} \Delta) n_{k,j} - \lambda_{k,j} \Delta \right]
 \end{aligned} \tag{4}$$

$$\begin{aligned}
 \log [p(x_k|y^k)] &= \left[ \frac{-(x_k - x_{k|k-1})^2}{2\sigma_{k|k-1}^2} + m_k \log \left( \frac{p_k}{1 - p_k} \right) + \log(1 - p_k) \right. \\
 &\quad \left. - \frac{(r_k - \gamma_0 - \gamma_1 x_k)^2}{2\sigma_v^2} - \frac{(s_k - \delta_0 - \delta_1 x_k)^2}{2\sigma_w^2} + \sum_{j=1}^J \log(\lambda_{k,j} \Delta) n_{k,j} - \lambda_{k,j} \Delta \right] + \text{const}
 \end{aligned} \tag{5}$$

We take the partial derivative of the logarithm term above and set it to 0 to solve for the mean.

$$\begin{aligned} \frac{\partial}{\partial x_k} \log [p(x_k|y^k)] &= \frac{-(x_k - x_{k|k-1})}{\sigma_{k|k-1}^2} + \beta_1(m_k - p_k) + \frac{\gamma_1(r_k - \gamma_0 - \gamma_1 x_k)}{\sigma_v^2} \\ &+ \frac{\delta_1(s_k - \delta_0 - \delta_1 x_k)}{\sigma_w^2} + \sum_{j=1}^J \frac{1}{\lambda_{k,j|k}} \frac{\partial \lambda_{k,j|k}}{\partial x_k} (n_{k,j} - \lambda_{k,j|k} \Delta) = 0. \end{aligned} \quad (6)$$

Solving for  $x_k$  in the equation above provides the filter update for  $x_{k|k}$ . We have taken,

$$\frac{\partial p_k}{\partial x_k} = \beta_1 p_k (1 - p_k) \quad (7)$$

when calculating the partial derivative. Similarly, the second partial derivative is,

$$\begin{aligned} \frac{\partial^2}{\partial x_k^2} \log [p(x_k|y^k)] &= \frac{-1}{\sigma_{k|k-1}^2} - \beta_1 \frac{\partial p_k}{\partial x_k} - \frac{\gamma_1^2}{\sigma_v^2} - \frac{\delta_1^2}{\sigma_w^2} + \frac{\partial}{\partial x_k} \left[ \sum_{j=1}^J \frac{1}{\lambda_{k,j|k}} \frac{\partial \lambda_{k,j|k}}{\partial x_k} (n_{k,j} - \lambda_{k,j|k} \Delta) \right] \\ &= \frac{-1}{\sigma_{k|k-1}^2} - \beta_1^2 p_k (1 - p_k) - \frac{\gamma_1^2}{\sigma_v^2} - \frac{\delta_1^2}{\sigma_w^2} \\ &+ \sum_{j=1}^J \left[ \frac{1}{\lambda_{k,j|k}} \frac{\partial^2 \lambda_{k,j|k}}{\partial x_k^2} (n_{k,j} - \lambda_{k,j|k} \Delta) - \frac{n_{k,j}}{\lambda_{k,j|k}^2} \left( \frac{\partial \lambda_{k,j|k}}{\partial x_k} \right)^2 \right]. \end{aligned} \quad (8)$$

The filter update for  $\sigma_{k|k}^2$  is given by [1],

$$\sigma_{k|k}^2 = \left\{ - \frac{\partial^2}{\partial x_k^2} \log [p(x_k|y^k)] \right\}^{-1}. \quad (9)$$

## 1.2 Derivation of the M-step updates

### 1.2.1 Complete data log-likelihood

Taking  $\mathcal{X}^K = \{x_1, x_2, \dots, x_K\}$ , the complete data likelihood conditioned on the model parameters  $\Theta$  is given by,

$$\begin{aligned} p(\mathcal{Y}^K, \mathcal{X}^K | \Theta) &= \prod_{k=1}^K p_k^{m_k} (1 - p_k)^{1 - m_k} \times \prod_{k=1}^K \frac{1}{\sqrt{2\pi\sigma_v^2}} e^{-\frac{(r_k - \gamma_0 - \gamma_1 x_k)^2}{2\sigma_v^2}} \\ &\times \prod_{k=1}^K \frac{1}{\sqrt{2\pi\sigma_w^2}} e^{-\frac{(s_k - \delta_0 - \delta_1 x_k)^2}{2\sigma_w^2}} \times \prod_{k=1}^K e^{\sum_{j=1}^J \log(\lambda_{k,j} \Delta) n_{k,j} - \lambda_{k,j} \Delta} \\ &\times \prod_{k=1}^K \frac{1}{\sqrt{2\pi\sigma_\varepsilon^2}} e^{-\frac{(x_k - \rho x_{k-1} - \alpha I_k)^2}{2\sigma_\varepsilon^2}}. \end{aligned} \quad (10)$$

The expected log-likelihood is,

$$Q = \sum_{k=1}^K \mathbb{E} \left[ m_k (\beta_0 + \beta_1 x_k) - \log (1 + e^{\beta_0 + \beta_1 x_k}) \right] + \frac{(-K)}{2} \log (2\pi\sigma_v^2)$$

$$\begin{aligned}
& - \sum_{k=1}^K \frac{\mathbb{E}[(r_k - \gamma_0 - \gamma_1 x_k)^2]}{2\sigma_v^2} + \frac{(-K)}{2} \log(2\pi\sigma_w^2) - \sum_{k=1}^K \frac{\mathbb{E}[(s_k - \delta_0 - \delta_1 x_k)^2]}{2\sigma_w^2} \\
& + \sum_{k=1}^K \sum_{j=1}^J \mathbb{E}[\log(\lambda_{k,j}\Delta)n_{k,j} - \lambda_{k,j}\Delta] + \frac{(-K)}{2} \log(2\pi\sigma_\varepsilon^2) - \sum_{k=1}^K \frac{\mathbb{E}[(x_k - \rho x_{k-1} - \alpha I_k)^2]}{2\sigma_\varepsilon^2}. \tag{11}
\end{aligned}$$

Following [2], we take

$$x_{k|K} = \mathbb{E}[x_k | \mathcal{Y}^K, \Theta] \tag{12}$$

$$U_k = \mathbb{E}[x_k^2 | \mathcal{Y}^K, \Theta] \tag{13}$$

$$U_{k,k+1} = \mathbb{E}[x_k x_{k+1} | \mathcal{Y}^K, \Theta]. \tag{14}$$

### 1.2.2 M-step updates for $\alpha$ and $\rho$

Let  $Q_1$  denote the term in  $Q$  that contains  $\alpha$  and  $\rho$ .

$$Q_1 = \frac{1}{2\sigma_\varepsilon^2} \sum_{k=1}^K \mathbb{E}[(x_k - \rho x_{k-1} - \alpha I_k)^2] \tag{15}$$

While it is possible to determine the starting state  $x_0$  as a separate parameter, we follow one of the options in [2, 3] and set  $x_0 = x_1$ . This permits some bias at the beginning. Therefore,

$$Q_1 = \frac{1}{2\sigma_\varepsilon^2} \left\{ \sum_{k=2}^K \mathbb{E}[(x_k - \rho x_{k-1} - \alpha I_k)^2] + \mathbb{E}[(\alpha I_1)^2] \right\}. \tag{16}$$

We take the partial derivatives of  $Q_1$  with respect to  $\alpha$  and  $\rho$  and set them to 0 to obtain the M-step updates.

$$\begin{aligned}
\frac{\partial Q_1}{\partial \alpha} &= \sum_{k=2}^K \mathbb{E}[-2I_k(x_k - \rho x_{k-1} - \alpha I_k)] + 2\alpha I_1^2 \\
0 &= - \sum_{k=2}^K I_k \mathbb{E}[x_k] + \rho \sum_{k=2}^K I_k \mathbb{E}[x_{k-1}] + \alpha \sum_{k=1}^K I_k^2 \\
&= - \sum_{k=2}^K I_k x_{k|K} + \rho \sum_{k=2}^K I_k x_{k-1|K} + \alpha \sum_{k=1}^K I_k^2 \tag{17}
\end{aligned}$$

$$\begin{aligned}
\frac{\partial Q_1}{\partial \rho} &= \sum_{k=2}^K \mathbb{E}[-2x_{k-1}(x_k - \rho x_{k-1} - \alpha I_k)] \\
0 &= - \sum_{k=2}^K \mathbb{E}[x_k x_{k-1}] + \rho \sum_{k=2}^K \mathbb{E}[x_{k-1}^2] + \alpha \sum_{k=2}^K I_k \mathbb{E}[x_{k-1}] \\
&= - \sum_{k=1}^{K-1} U_{k,k+1} + \rho \sum_{k=1}^{K-1} U_k + \alpha \sum_{k=2}^K I_k x_{k-1|K} \tag{18}
\end{aligned}$$

$$\tag{19}$$

The solutions to these simultaneous equations provide  $\alpha$  and  $\rho$ .

### 1.2.3 M-step updates for $\gamma_0$ , $\gamma_1$ , $\delta_0$ and $\delta_1$

Let  $Q_2$  denote the term in  $Q$  containing  $\gamma_0$  and  $\gamma_1$ .

$$Q_2 = \sum_{k=1}^K \frac{\mathbb{E}[(r_k - \gamma_0 - \gamma_1 x_k)^2]}{2\sigma_v^2} \quad (20)$$

Taking the partial derivatives with respect to  $\gamma_0$  and  $\gamma_1$  yields,

$$\begin{aligned} \frac{\partial Q_2}{\partial \gamma_0} &= \sum_{k=1}^K -2\mathbb{E}[r_k - \gamma_0 - \gamma_1 x_k] \\ 0 &= -\sum_{k=1}^K r_k + \gamma_0 K + \gamma_1 \sum_{k=1}^K \mathbb{E}[x_k] \\ &= -\sum_{k=1}^K r_k + \gamma_0 K + \gamma_1 \sum_{k=1}^K x_{k|K} \end{aligned} \quad (21)$$

$$\begin{aligned} \frac{\partial Q_2}{\partial \gamma_1} &= \sum_{k=1}^K -2\mathbb{E}[x_k(r_k - \gamma_0 - \gamma_1 x_k)] \\ 0 &= -\sum_{k=1}^K r_k \mathbb{E}[x_k] + \gamma_0 \sum_{k=1}^K \mathbb{E}[x_k] + \gamma_1 \sum_{k=1}^K \mathbb{E}[x_k^2] \\ &= -\sum_{k=1}^K r_k x_{k|K} + \gamma_0 \sum_{k=1}^K x_{k|K} + \gamma_1 \sum_{k=1}^K U_k. \end{aligned} \quad (22)$$

The solutions to these simultaneous equations provide  $\gamma_0$  and  $\gamma_1$ .  $\delta_0$  and  $\delta_1$  may be obtained similarly from the term in  $Q$  containing  $s_k$ .

### 1.2.4 M-step updates for $\sigma_v^2$ and $\sigma_w^2$

Let  $Q_3$  denote the term in  $Q$  containing  $\sigma_v^2$ .

$$Q_3 = \frac{-K}{2} \log(2\pi\sigma_v^2) - \sum_{k=1}^K \frac{\mathbb{E}[(r_k - \gamma_0 - \gamma_1 x_k)^2]}{2\sigma_v^2} \quad (23)$$

We take the partial derivative with respect to  $\sigma_v^2$  and set it to 0.

$$\frac{\partial Q_3}{\partial \sigma_v^2} = \frac{-K}{2\sigma_v^2} + \frac{1}{2\sigma_v^4} \sum_{k=1}^K \mathbb{E}[(r_k - \gamma_0 - \gamma_1 x_k)^2] = 0 \quad (24)$$

$$\begin{aligned} \sigma_v^2 &= \frac{1}{K} \sum_{k=1}^K \mathbb{E}[(r_k - \gamma_0 - \gamma_1 x_k)^2] \\ &= \frac{1}{K} \left\{ \sum_{k=1}^K r_k^2 + K\gamma_0^2 + \gamma_1^2 \sum_{k=1}^K \mathbb{E}[x_k^2] - 2\gamma_0 \sum_{k=1}^K r_k - 2\gamma_1 \sum_{k=1}^K r_k \mathbb{E}[x_k] + 2\gamma_0 \gamma_1 \sum_{k=1}^K \mathbb{E}[x_k] \right\} \\ &= \frac{1}{K} \left\{ \sum_{k=1}^K r_k^2 + K\gamma_0^2 + \gamma_1^2 \sum_{k=1}^K U_k - 2\gamma_0 \sum_{k=1}^K r_k - 2\gamma_1 \sum_{k=1}^K r_k x_{k|K} + 2\gamma_0 \gamma_1 \sum_{k=1}^K x_{k|K} \right\}. \end{aligned} \quad (25)$$

The update for  $\sigma_w^2$  may be obtained likewise.

### 1.2.5 M-step update for $\sigma_\varepsilon^2$

Let  $Q_4$  denote the term in  $Q$  containing  $\sigma_\varepsilon^2$ .

$$\begin{aligned} Q_4 &= \frac{-K}{2} \log(2\pi\sigma_\varepsilon^2) - \sum_{k=1}^K \frac{\mathbb{E}\left[(x_k - \rho x_{k-1} - \alpha I_k)^2\right]}{2\sigma_\varepsilon^2} \\ &= \frac{-K}{2} \log(2\pi\sigma_\varepsilon^2) - \sum_{k=2}^K \frac{\mathbb{E}\left[(x_k - \rho x_{k-1} - \alpha I_k)^2\right]}{2\sigma_\varepsilon^2} - \frac{\mathbb{E}\left[(\alpha I_1)^2\right]}{2\sigma_\varepsilon^2} \end{aligned} \quad (26)$$

We take the partial derivative with respect to  $\sigma_\varepsilon^2$  and set it to 0.

$$\frac{\partial Q_4}{\partial \sigma_\varepsilon^2} = \frac{-K}{2\sigma_\varepsilon^2} + \frac{1}{2\sigma_\varepsilon^4} \sum_{k=2}^K \mathbb{E}\left[(x_k - \rho x_{k-1} - \alpha I_k)^2\right] + \frac{(\alpha I_1)^2}{2\sigma_\varepsilon^4} = 0 \quad (27)$$

$$\begin{aligned} \sigma_\varepsilon^2 &= \frac{1}{K} \sum_{k=2}^K \left\{ \mathbb{E}[x_k^2] - 2\rho \mathbb{E}[x_k x_{k-1}] + \rho^2 \mathbb{E}[x_{k-1}^2] - 2\alpha I_k \mathbb{E}[x_k] + 2\alpha \rho I_k \mathbb{E}[x_{k-1}] \right\} + \frac{\alpha^2}{K} \sum_{k=1}^K I_k^2 \\ &= \frac{1}{K} \left\{ \sum_{k=2}^K U_k - 2\rho \sum_{k=1}^{K-1} U_{k,k+1} + \rho^2 \sum_{k=1}^{K-1} U_k - 2\alpha \sum_{k=2}^K I_k x_{k|K} + 2\alpha \rho \sum_{k=2}^K I_k x_{k-1|K} + \alpha^2 \sum_{k=1}^K I_k^2 \right\} \end{aligned} \quad (28)$$

### 1.2.6 M-step updates for $\beta_0$ and $\beta_1$

Let  $Q_5$  denote the expectation term containing  $\beta_0$  and  $\beta_1$ .

$$Q_5 = \sum_{k=1}^K \mathbb{E}\left[m_k(\beta_0 + \beta_1 x_k) - \log(1 + e^{\beta_0 + \beta_1 x_k})\right] \quad (29)$$

We perform a Taylor expansion of the logarithm term around  $x_{k|K}[1]$ .

$$\log(1 + e^{\beta_0 + \beta_1 x_k}) \approx \log(1 + e^{\beta_0 + \beta_1 x_{k|K}}) + \beta_1 p_{k|K} (x_k - x_{k|K}) + \frac{\beta_1^2}{2} p_{k|K} (1 - p_{k|K}) (x_k - x_{k|K})^2 \quad (30)$$

Taking the expected value on both sides,

$$\begin{aligned} \mathbb{E}\left[\log(1 + e^{\beta_0 + \beta_1 x_k})\right] &\approx \log(1 + e^{\beta_0 + \beta_1 x_{k|K}}) + \beta_1 p_{k|K} \mathbb{E}[x_k - x_{k|K}] + \frac{\beta_1^2}{2} p_{k|K} (1 - p_{k|K}) \mathbb{E}[(x_k - x_{k|K})^2] \\ &= \log(1 + e^{\beta_0 + \beta_1 x_{k|K}}) + 0 + \frac{\beta_1^2}{2} p_{k|K} (1 - p_{k|K}) \sigma_{k|K}^2. \end{aligned} \quad (31)$$

Therefore,

$$Q_5 \approx \sum_{k=1}^K \left[ m_k(\beta_0 + \beta_1 x_{k|K}) - \log(1 + e^{\beta_0 + \beta_1 x_{k|K}}) - \frac{\beta_1^2}{2} p_{k|K} (1 - p_{k|K}) \sigma_{k|K}^2 \right]. \quad (32)$$

Now,

$$\frac{\partial p_{k|K}}{\partial \beta_0} = \frac{\partial}{\partial \beta_0} \left[ \frac{1}{1 + e^{-(\beta_0 + \beta_1 x_{k|K})}} \right]$$

$$\begin{aligned}
&= \frac{(-1)}{\left[1 + e^{-(\beta_0 + \beta_1 x_{k|K})}\right]^2} \times \left[-e^{-(\beta_0 + \beta_1 x_{k|K})}\right] \\
&= p_{k|K}(1 - p_{k|K}).
\end{aligned} \tag{33}$$

And similarly,

$$\frac{\partial p_{k|K}}{\partial \beta_1} = p_{k|K}(1 - p_{k|K})x_{k|K}. \tag{34}$$

Taking the partial derivative w.r.t.  $\beta_0$ ,

$$\begin{aligned}
\frac{\partial Q_5}{\partial \beta_0} &= \sum_{k=1}^K \left\{ m_k - p_{k|K} - \frac{\beta_1^2 \sigma_{k|K}^2}{2} \frac{\partial}{\partial \beta_0} \left[ p_{k|K}(1 - p_{k|K}) \right] \right\} \\
0 &= \sum_{k=1}^K \left[ m_k - p_{k|K} - \frac{\beta_1^2 \sigma_{k|K}^2}{2} (1 - p_{k|K})(1 - 2p_{k|K})p_{k|K} \right].
\end{aligned} \tag{35}$$

And similarly for  $\beta_1$  we arrive at,

$$\begin{aligned}
\frac{\partial Q_5}{\partial \beta_1} &= \sum_{k=1}^K \left[ m_k x_{k|K} - x_{k|K} p_{k|K} \right. \\
&\quad \left. - \frac{\beta_1 \sigma_{k|K}^2}{2} p_{k|K}(1 - p_{k|K}) [2 + \beta_1 x_{k|K}(1 - 2p_{k|K})] \right] \\
&= 0
\end{aligned} \tag{36}$$

### 1.2.7 Approximation for the expectation term containing $\lambda_{k,j}$

Let  $Q_6$  denote the expectation term containing  $\lambda_{k,j}$ .

$$Q_6 = \sum_{k=1}^K \sum_{j=1}^J \mathbb{E} \left[ \log(\lambda_{k,j} \Delta) n_{k,j} - \lambda_{k,j} \Delta \right] \tag{37}$$

We perform a Taylor expansion of the summed term around  $x_{k|K}$  [1].

$$\begin{aligned}
\log(\lambda_{k,j} \Delta) n_{k,j} - \lambda_{k,j} \Delta &\approx \log(\lambda_{k,j|K} \Delta) n_{k,j} - \lambda_{k,j|K} \Delta + \frac{1}{\lambda_{k,j|K}} \frac{\partial \lambda_{k,j|K}}{\partial x_k} (n_{k,j} - \lambda_{k,j|K} \Delta) (x_k - x_{k|K}) \\
&\quad + \frac{1}{2} \left[ \frac{1}{\lambda_{k,j|K}} \frac{\partial^2 \lambda_{k,j|K}}{\partial x_k^2} (n_{k,j} - \lambda_{k,j|K} \Delta) - \frac{n_{k,j}}{\lambda_{k,j|K}^2} \left( \frac{\partial \lambda_{k,j|K}}{\partial x_k} \right)^2 \right] (x_k - x_{k|K})^2
\end{aligned} \tag{38}$$

Taking the expected value on both sides,

$$\begin{aligned}
\mathbb{E} \left[ \log(\lambda_{k,j} \Delta) n_{k,j} - \lambda_{k,j} \Delta \right] &\approx \log(\lambda_{k,j|K} \Delta) n_{k,j} - \lambda_{k,j|K} \Delta + \frac{1}{\lambda_{k,j|K}} \frac{\partial \lambda_{k,j|K}}{\partial x_k} (n_{k,j} - \lambda_{k,j|K} \Delta) \mathbb{E} [x_k - x_{k|K}] \\
&\quad + \frac{1}{2} \left[ \frac{1}{\lambda_{k,j|K}} \frac{\partial^2 \lambda_{k,j|K}}{\partial x_k^2} (n_{k,j} - \lambda_{k,j|K} \Delta) - \frac{n_{k,j}}{\lambda_{k,j|K}^2} \left( \frac{\partial \lambda_{k,j|K}}{\partial x_k} \right)^2 \right] \mathbb{E} [x_k - x_{k|K}]^2 \\
&\approx \log(\lambda_{k,j|K} \Delta) n_{k,j} - \lambda_{k,j|K} \Delta + 0
\end{aligned}$$

$$+ \frac{1}{2} \left[ \frac{1}{\lambda_{k,j|K}} \frac{\partial^2 \lambda_{k,j|K}}{\partial x_k^2} (n_{k,j} - \lambda_{k,j|K} \Delta) - \frac{n_{k,j}}{\lambda_{k,j|K}^2} \left( \frac{\partial \lambda_{k,j|K}}{\partial x_k} \right)^2 \right] \sigma_{k|K}^2. \quad (39)$$

Therefore,

$$Q_6 \approx \sum_{k=1}^K \sum_{j=1}^J \log(\lambda_{k,j|K} \Delta) n_{k,j} - \lambda_{k,j|K} \Delta + \frac{1}{2} \left[ \frac{1}{\lambda_{k,j|K}} \frac{\partial^2 \lambda_{k,j|K}}{\partial x_k^2} (n_{k,j} - \lambda_{k,j|K} \Delta) - \frac{n_{k,j}}{\lambda_{k,j|K}^2} \left( \frac{\partial \lambda_{k,j|K}}{\partial x_k} \right)^2 \right] \sigma_{k|K}^2. \quad (40)$$

## 2 Experimental data – model parameter estimates

The experimental model parameters estimated for each participant are shown in Table 1. Recall that we estimate  $x_k$  at the E-step and calculate the model parameters at the M-step. Recall also that due to computational complexity we split the estimation of the model parameters related to heart rate (i.e., the  $\theta_i$ 's and the  $\eta$  coefficient) into two parts and calculate them separately. We calculate the  $\theta_i$ 's offline based on maximum likelihood estimation (MLE) and select  $\eta$  based on which value maximized a log-likelihood term. As pointed out in the ‘‘Discussion’’ section of the main text, this separated-out calculation is a limitation of our model (e.g. it can result in numerical issues). The separate estimation of the heart rate parameters may be the reason why  $\eta$  values are small in the final estimates and why larger  $\eta$  values cause convergence issues in the Newton-Raphson solution for the state update  $x_{k|k}$  since the MLE estimation of the  $\theta_i$ 's may account for much of the heart rate variability. The value of  $\beta_1$  also turned out to be negative for two participants (the M-step updates turned out to be negative even after the first iteration). Our algorithm provides two options for calculating  $\beta_0$  and  $\beta_1$  and it is possible to select the alternate option which sets  $\beta_0 = 1$  and calculates  $\beta_1$  empirically as well if this is to be avoided beforehand. As noted in the main text, a model with a less complex form of the conditional intensity function may enable all the parameters to be recovered at once at the M-step. Lower computational load is also likely to have the benefit of easier deployment onto a wearable platform.

Table 1: Estimated model parameters on experimental data

| Participant | $\alpha$ | $\rho$ | $\delta_0$ | $\delta_1$ | $\sigma_w^2$ | $\gamma_0$ | $\gamma_1$ | $\sigma_v^2$ | $\beta_0$ | $\beta_1$ | $\sigma_\varepsilon^2$ | $\eta$            |
|-------------|----------|--------|------------|------------|--------------|------------|------------|--------------|-----------|-----------|------------------------|-------------------|
| 1           | 0.1339   | 0.9964 | 6.0453     | 0.8501     | 0.4475       | -2.1516    | 0.8182     | 0.4881       | -4.5533   | 0.1642    | 0.0147                 | -10 <sup>-4</sup> |
| 2           | 0.1752   | 0.9984 | 10.4601    | 0.8507     | 0.4731       | -6.3457    | 0.8019     | 0.5319       | -4.9209   | 0.1145    | 0.0149                 | -10 <sup>-6</sup> |
| 3           | 0.2050   | 0.9944 | 15.4847    | 0.9157     | 0.5967       | -2.9270    | 0.8805     | 0.6270       | -3.9055   | 0.2620    | 0.0196                 | -10 <sup>-6</sup> |
| 4           | 0.2122   | 0.9889 | 14.8302    | 0.9337     | 0.5191       | -3.3621    | 0.9018     | 0.5515       | -3.1620   | 0.0282    | 0.0195                 | -10 <sup>-6</sup> |
| 5           | 0.1779   | 0.9963 | 13.4671    | 0.8726     | 0.4388       | -3.6769    | 0.7916     | 0.5381       | -3.7924   | -0.1577   | 0.0150                 | -10 <sup>-6</sup> |
| 6           | 0.1532   | 0.9888 | 14.6993    | 0.8869     | 0.4876       | -0.5512    | 0.8542     | 0.5247       | -3.8582   | 0.1047    | 0.0170                 | -10 <sup>-5</sup> |
| 7           | 0.0934   | 0.9986 | 4.0806     | 0.8944     | 0.2311       | -2.6035    | 0.8653     | 0.2804       | -4.1830   | 0.5256    | 0.0109                 | -10 <sup>-3</sup> |
| 8           | 0.1231   | 0.9933 | 13.5384    | 0.8755     | 0.4095       | -0.9875    | 0.8193     | 0.4829       | -3.6242   | 0.3115    | 0.0148                 | -10 <sup>-4</sup> |
| 9           | 0.1587   | 0.9966 | 6.0052     | 0.9050     | 0.3256       | -4.0313    | 0.8408     | 0.4178       | -3.6640   | -0.1002   | 0.0141                 | -10 <sup>-6</sup> |
| 10          | 0.1365   | 0.9911 | 5.6286     | 0.8804     | 0.3722       | -2.1238    | 0.8515     | 0.4127       | -4.3647   | 0.1101    | 0.0142                 | -10 <sup>-4</sup> |
| 11          | 0.1533   | 0.9947 | 17.6648    | 0.9119     | 0.4269       | -0.7794    | 0.8601     | 0.4901       | -3.4974   | 0.1716    | 0.0171                 | -10 <sup>-3</sup> |
| 12          | 0.1536   | 0.9931 | 11.5030    | 0.9069     | 0.3077       | -1.6278    | 0.8558     | 0.3835       | -4.0583   | 0.2806    | 0.0140                 | -10 <sup>-6</sup> |

  

| Participant | $\theta_i$ 's                                                                      |
|-------------|------------------------------------------------------------------------------------|
| 1           | 0.0744, 1.1497, -0.1054, -0.1686, 1289.5                                           |
| 2           | 0.0733, 1.0793, -0.2674, -0.0028, 0.4085, -0.4041, -0.0461, 0.1289, 0.0149, 1404.5 |
| 3           | 0.2484, 0.7572, 231.5820                                                           |
| 4           | 0.2079, 1.3273, -0.4968, -0.0615, -0.0765, -0.0068, 0.0194, 341.5199               |
| 5           | 0.1319, 1.3161, -0.4226, -0.1202, 0.0481, -0.0603, 0.0376, 561.4294                |
| 6           | 0.0677, 0.9083, 625.1079                                                           |
| 7           | 0.1478, 1.0039, -0.2359, 0.0760, 585.6449                                          |
| 8           | 0.1289, 1.1844, -0.3928, 699.4618                                                  |
| 9           | 0.0229, 0.7706, -0.0228, -0.1910, 0.2809, 0.1220, 1253.4                           |
| 10          | 0.1575, 1.1033, -0.3104, 714.4876                                                  |
| 11          | 0.0990, 1.0544, -0.4583, 0.0098, 0.1616, 0.0254, -0.0710, 0.0540, 0.1015, 107.0561 |
| 12          | 0.0818, 0.7980, -0.2500, 0.0853, 0.2650, 693.1574                                  |



## References

- [1] Coleman TP, Yanike M, Suzuki WA, Brown EN. A mixed-filter algorithm for dynamically tracking learning from multiple behavioral and neurophysiological measures. In: *The dynamic brain: An exploration of neuronal variability and its functional significance*. Oxford Univ. Press; 2011. p. 1–16.
- [2] Smith AC, Frank LM, Wirth S, Yanike M, Hu D, Kubota Y, et al. Dynamic analysis of learning in behavioral experiments. *Journal of Neuroscience*. 2004;24(2):447–461.
- [3] Prerau MJ, Smith AC, Eden UT, Kubota Y, Yanike M, Suzuki W, et al. Characterizing learning by simultaneous analysis of continuous and binary measures of performance. *Journal of Neurophysiology*. 2009;102(5):3060–3072.
